# Supplementary material for: Comparison of the Microbiota and Inorganic Anion Content in the Saliva of Patients with Gastroesophageal Reflux Disease and Gastroesophageal Reflux Disease‐Free Individuals
Source: Hindawi journal article supplement (doi:10.1155/2020/2681791), 2020-01-01
Supplement: f1 [file 2681791.f1.pdf]

Supplementary Information:

**Comparison of the Microbiota and Inorganic Anion Content in the Saliva of Patients with Gastroesophageal Reflux Disease and Gastroesophageal Reflux Disease-Free Individuals**

**Elvira E. Ziganshina,<sup>1</sup> Ildar I. Sagitov,<sup>2</sup> Ramilya F. Akhmetova,<sup>1</sup> Gulshat T. Saleeva,<sup>2</sup> Andrey P. Kiassov,<sup>3</sup> Natalya E. Gogoleva,<sup>4</sup> Elena I. Shagimardanova,<sup>4</sup> and Ayrat M. Ziganshin<sup>1</sup>**

*<sup>1</sup>Department of Microbiology, Institute of Fundamental Medicine and Biology, Kazan (Volga Region) Federal University, Kazan 420008, Russia*

*<sup>2</sup>Department of Orthopedic Dentistry, Kazan State Medical University, Kazan 420012, Russia*

*<sup>3</sup>Department of Morphology and General Pathology, Institute of Fundamental Medicine and Biology, Kazan (Volga Region) Federal University, Kazan 420008, Russia*

*<sup>4</sup>Laboratory of Extreme Biology, Institute of Fundamental Medicine and Biology, Kazan (Volga Region) Federal University, Kazan 420021, Russia*

\* E-mail: ayrat.ziganshin@kpfu.ru (A.M. Ziganshin).

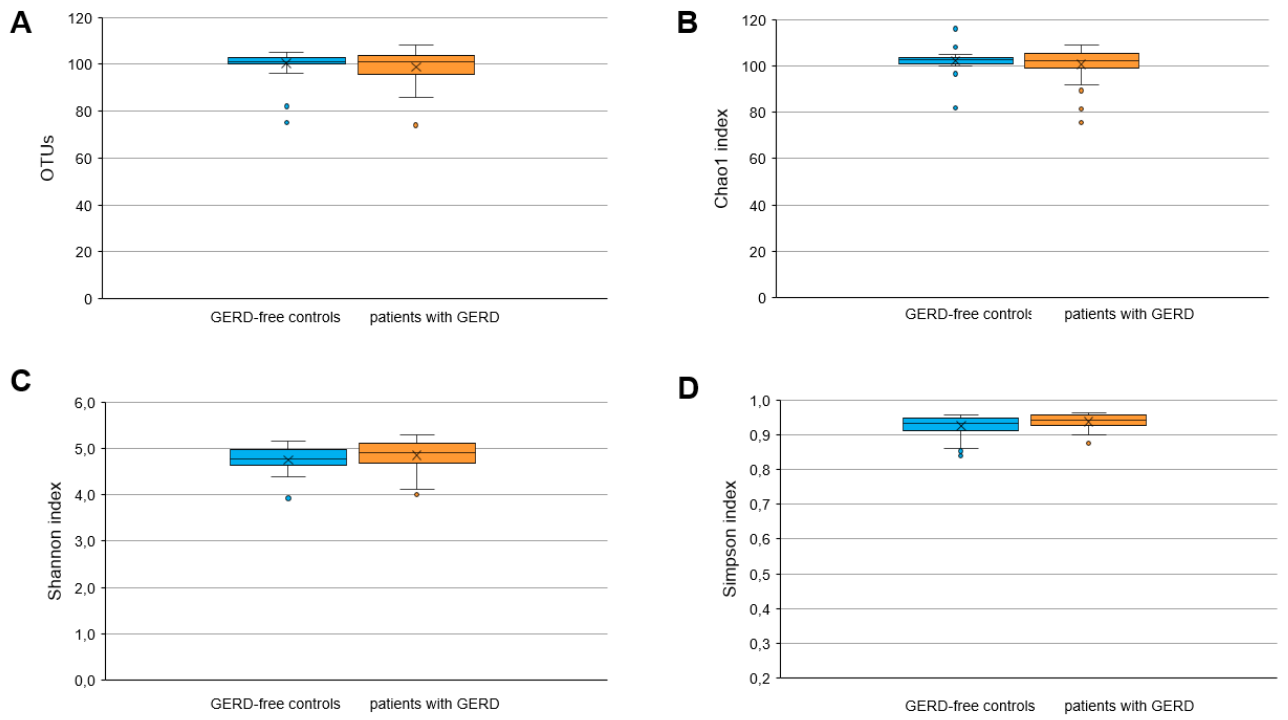

**Figure S1.** Calculation of the alpha diversity indices for the salivary bacterial communities associated with gastroesophageal reflux disease-free subjects and patients with gastroesophageal reflux disease (A – observed OTUs; B – Chao1 index; C – Shannon index; D – Simpson index).

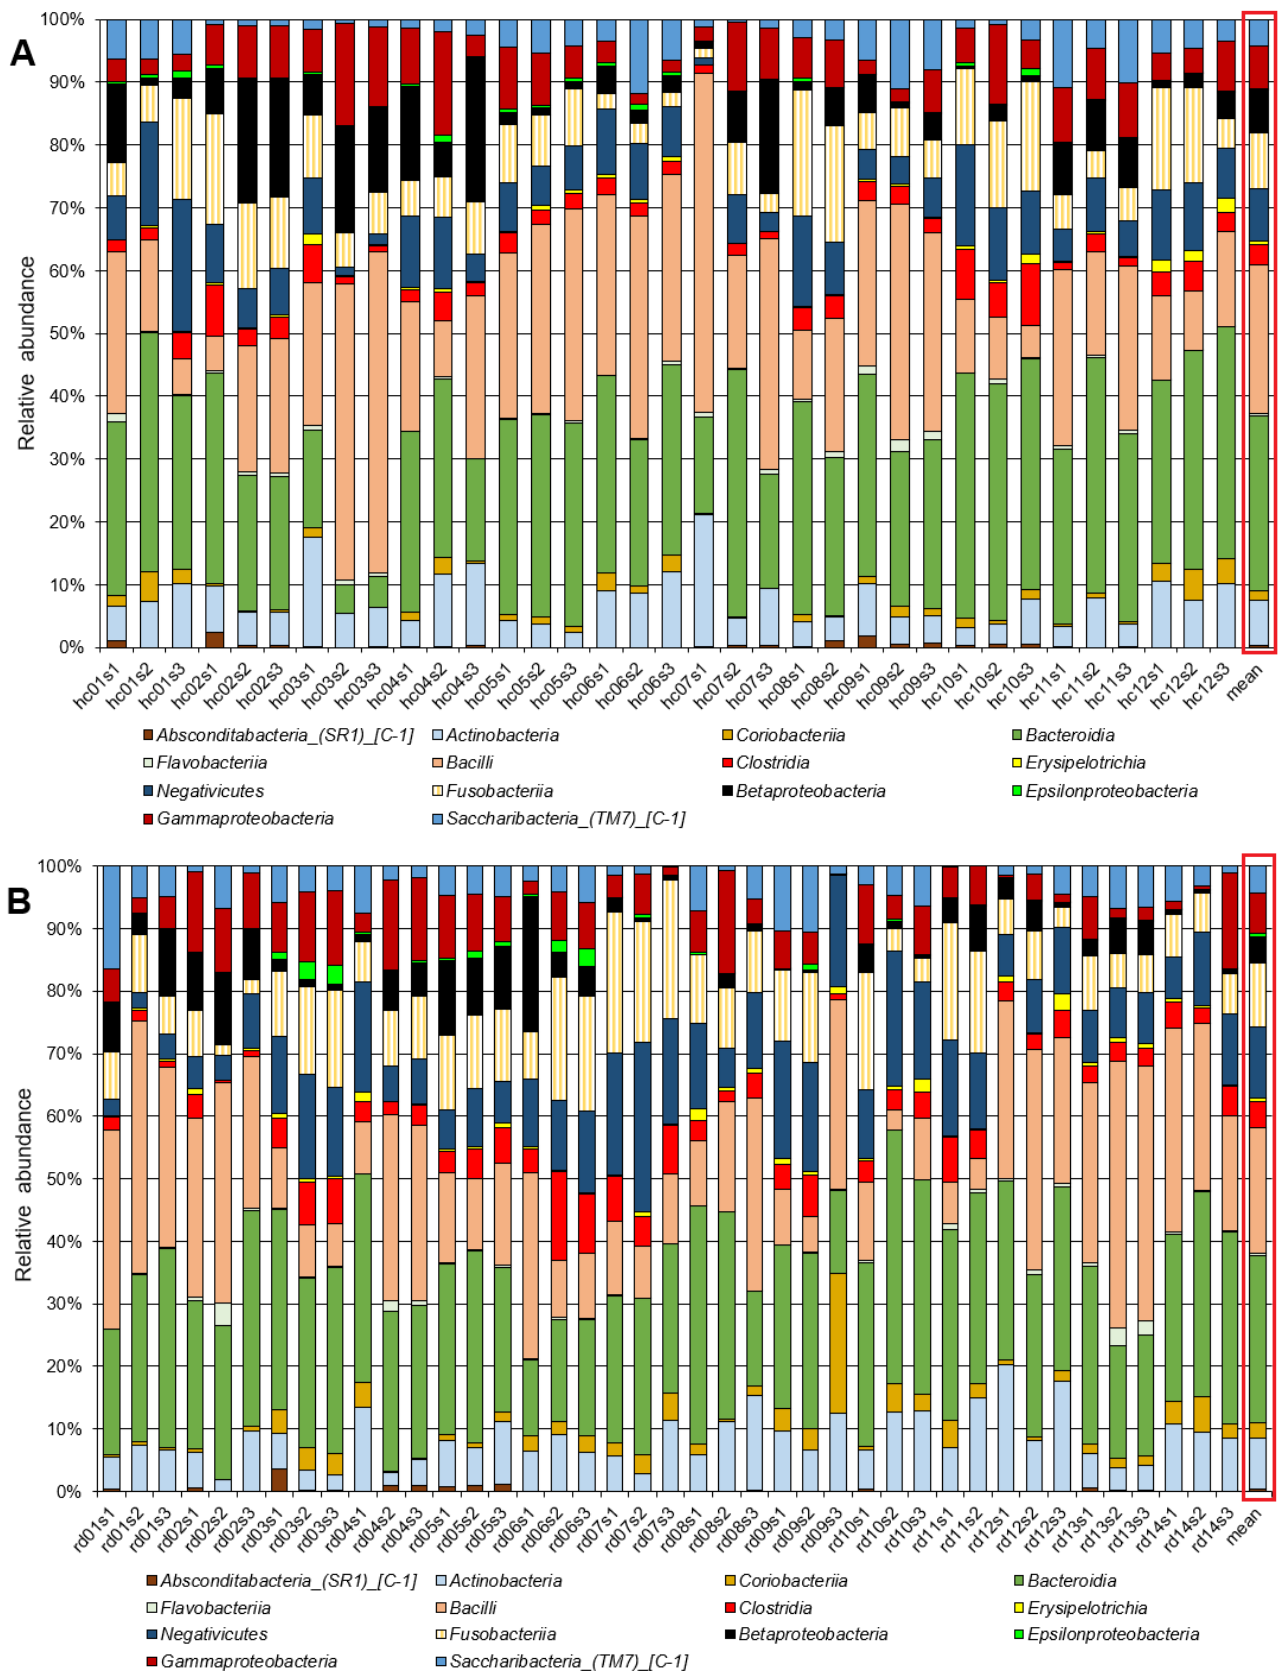

**Figure S2.** Taxonomic composition of the salivary bacterial communities for (A) gastroesophageal reflux disease-free subjects and (B) patients with gastroesophageal reflux disease. Bacterial community composition according to sequencing of 16S rRNA gene is shown on the class level. In the framed red box, a summary of salivary bacterial communities associated with gastroesophageal reflux disease-free controls (hc) and patients with gastroesophageal reflux disease (rd) is demonstrated.
